# Supplementary material for: RNA cytometry of single-cells using semi-permeable microcapsules
Source: PubMed Central journal article supplement — Nucleic Acids Res. 2022 Oct 21;51(1):e2. doi: 10.1093/nar/gkac918 (PMC9841424; doi:10.1093/nar/gkac918), 2022-10-21
Supplement: gkac918_supplemental_file.pdf [file gkac918_supplemental_file.pdf]

## **SUPPLEMENTARY INFORMATION**

RNA cytometry of single-cells using semi-permeable microcapsules

Greta Leonavičienė and Linas Mažutis

Institute of Biotechnology, Life Sciences Centre, Vilnius University, 7 Sauletekio av., Vilnius, Lithuania

## Supplementary Tables

**Supplementary Table S1.** DNA primer sequences.

| Name                                      | Sequence (5'-3')                       | Product length |
|-------------------------------------------|----------------------------------------|----------------|
| 555-YAP-forward                           | Alexa Fluor 555-CCCTCGTTTTGCCATGAACC   | 584 bp         |
| YAP-reverse                               | CCAGTGTTCCAAGGTCCACA                   |                |
| 488-PTPRC -forward                        | Alexa Fluor 488-ACATTGCTGCACAAGGTCCCAG | 532 bp         |
| PTPRC -reverse                            | AACCATCAGGCATCTCTGTGCGC                |                |
| 647-ACTB-forward                          | Alexa Fluor 647-ATTCTATGTGGGCGACGA     | 607 bp         |
| ACTB-reverse                              | AATGGTGATGACCTGGCCG                    |                |
| 647-B2M-forward                           | Alexa Fluor 647-AGCAGCATCATGGAGGTTTGA  | 513 bp         |
| B2M-reverse                               | CCAGATTAACCACAACCATGCC                 |                |
| 647-TBP-forward                           | Alexa Fluor 647-GCGCAAGGGTTTCTGGTTTG   | 539 bp         |
| TBP-reverse                               | TTTGCAGCTGCGGTACAATC                   |                |
| 555-PML-RARA-forward                      | Alexa Fluor 555-AGCGCGACTACGAGGAGAT    | 688 bp         |
| PML-RARA-reverse                          | CTGCTGCTCTGGGTCTCAAT                   |                |
| 546-BCR-ABL-forward                       | Alexa Fluor 546-GAAGTGTTCAGAAGCTTCTCC  | 417 bp         |
| BCR-ABL-reverse                           | GTTTGGGCTTCACACCATTC                   |                |
| <b>DNA primer sequences used for qPCR</b> |                                        |                |
| YAP-forward                               | CCCTCGTTTTGCCATGAACC                   | 584 bp         |
| YAP-reverse                               | CCAGTGTTCCAAGGTCCACA                   |                |
| PTPRC -forward                            | ACATTGCTGCACAAGGTCCCAG                 | 532 bp         |
| PTPRC -reverse                            | AACCATCAGGCATCTCTGTGCGC                |                |
| ACTB-forward                              | ATTCTATGTGGGCGACGA                     | 607 bp         |
| ACTB-reverse                              | AATGGTGATGACCTGGCCG                    |                |
| B2M-forward                               | AGCAGCATCATGGAGGTTTGA                  | 513 bp         |
| B2M-reverse                               | CCAGATTAACCACAACCATGCC                 |                |
| TBP-forward                               | GCGCAAGGGTTTCTGGTTTG                   | 539 bp         |
| TBP-reverse                               | TTTGCAGCTGCGGTACAATC                   |                |
| PML-RARA-forward                          | AGCGCGACTACGAGGAGAT                    | 688 bp         |
| PML-RARA-reverse                          | CTGCTGCTCTGGGTCTCAAT                   |                |
| BCR-ABL-forward                           | GAAGTGTTCAGAAGCTTCTCC                  | 417 bp         |
| BCR-ABL-reverse                           | GTTTGGGCTTCACACCATTC                   |                |

**Supplementary Table S2.** The Ct values of the marker genes determined by bulk RT-qPCR.

| Sample | The Ct values* of marker genes |              |              |              |              |              |              |
|--------|--------------------------------|--------------|--------------|--------------|--------------|--------------|--------------|
|        | ACTB                           | B2M          | TBP          | PTPRC        | YAP          | PML-RARA     | BCR-ABL      |
| K-562  | 16.74 ± 0.13                   | 18.07 ± 0.03 | 22.80 ± 0.02 | 22.95 ± 0.03 | No signal    | Not tested   | 21.76 ± 0.06 |
| HEK293 | 15.58 ± 0.08                   | 18.15 ± 0.11 | 21.54 ± 0.11 | 34.01 ± 0.34 | 21.26 ± 0.14 | Not tested   | Not tested   |
| NB-4   | 15.16 ± 0.19                   | 16.27 ± 0.06 | 22.87 ± 0.10 | 21.58 ± 0.03 | Not tested   | 29.26 ± 0.23 | No signal    |
| PBMC   | 20.47 ± 0.07                   | 19.00 ± 0.05 | 29.62 ± 0.22 | 22.51 ± 0.13 | Not tested   | No signal    | Not tested   |
| NTC    | No signal                      | No signal    | No signal    | No signal    | No signal    | No signal    | No signal    |

\* The Ct values were determined by real-time qPCR on QuantStudio 1 instrument using 40 ng/μl of total RNA extracted from K-562, HEK293 and NB-4 cells, and 5 ng/μl of total RNA extracted from PBMCs (ATCC). The primer pairs used for qPCR are listed in Supplementary Table S1. The values represent the mean and standard deviation from three technical replicates.

**Supplementary Table S3.** Comparative analysis of the multiplex single cell RT-PCR results using flow cytometry and epifluorescence microscopy.

| Sample ID                  | Total counts | ACTB positive | YAP positive | YAP & ACTB positive | PTPRC positive | PTPRC & ACTB positive | YAP & PTPTC Positive | YAP & PTPTC & ACTB positive |
|----------------------------|--------------|---------------|--------------|---------------------|----------------|-----------------------|----------------------|-----------------------------|
| <b>Microscopy analysis</b> |              |               |              |                     |                |                       |                      |                             |
| K-562                      | 2822         | 285 (10.1%)   | 3 (0.11%)    | 3 (0.11%)           | 90 (3.19%)     | 90 (3.19%)            | 2 (0.07%)            | 2 (0.07%)                   |
| HEK293                     | 2128         | 272 (12.78%)  | 103 (4.84%)  | 102 (4.79%)         | 0 (0.0%)       | 0 (0.0%)              | 0 (0.0%)             | 0 (0.0%)                    |
| K-562 & HEK293             | 2006         | 361 (18.0%)   | 69 (3.44%)   | 68 (3.39%)          | 36 (1.79%)     | 36 (1.79%)            | 3 (0.15%)            | 3 (0.15%)                   |
| <b>FACS analysis</b>       |              |               |              |                     |                |                       |                      |                             |
| K-562                      | 23628        | 2565 (10.86%) | 84 (0.36%)   | 18 (0.08%)          | 858 (3.63%)    | 850 (3.60%)           | 1 (<0.01%)           | 1 (<0.01%)                  |
| HEK293                     | 19574        | 2800 (14.30%) | 1069 (5.46%) | 1011 (5.17%)        | 1 (<0.01%)     | 1 (<0.01%)            | 6 (0.03%)            | 6 (0.03%)                   |
| K-562 & HEK293             | 31061        | 5881 (18.93%) | 940 (3.03%)  | 863 (2.78%)         | 524 (1.69%)    | 516 (1.66%)           | 6 (0.02%)            | 5 (0.02%)                   |

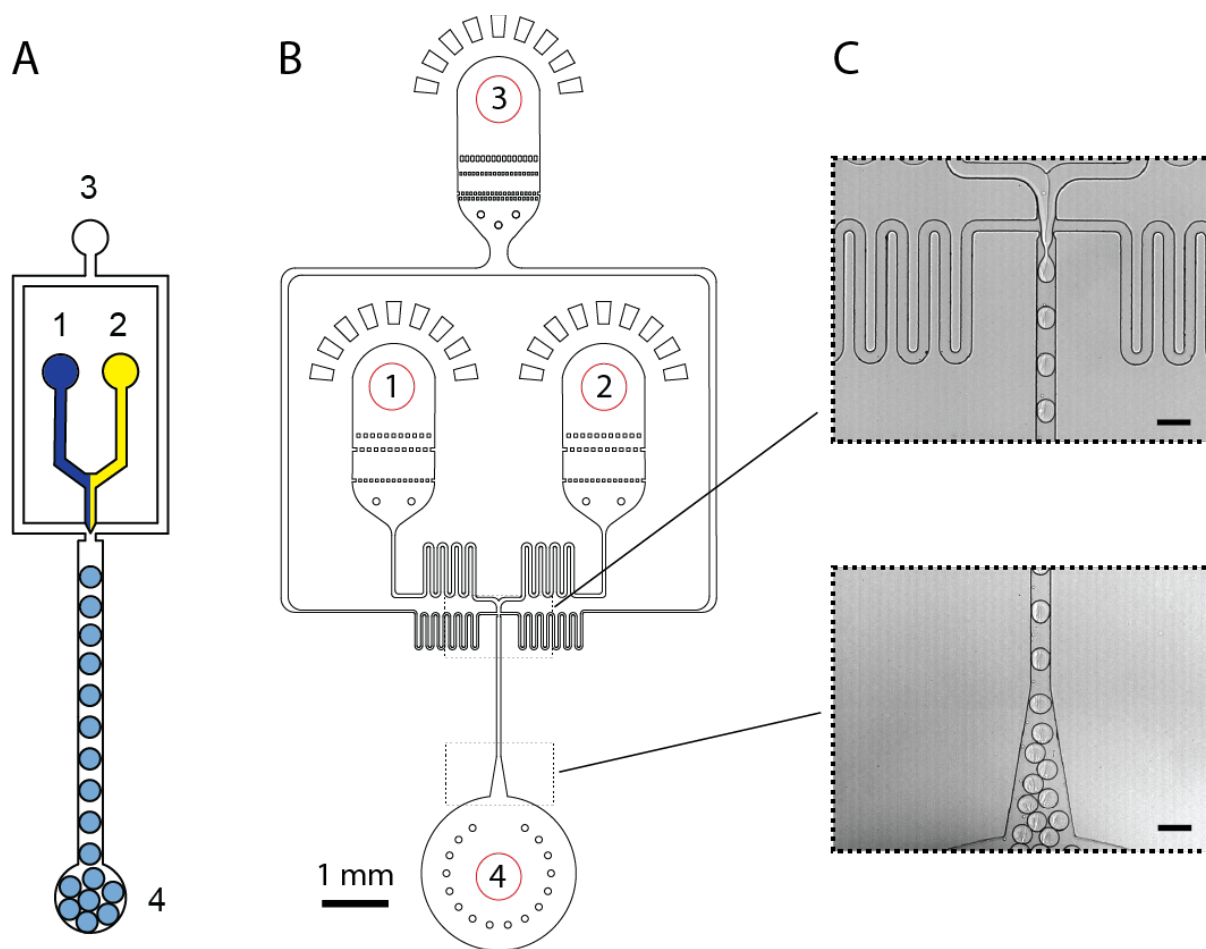

**Supplementary Figure S1. Design of the microfluidics device and its operation.** **A)** Operation of the microfluidics device. The microfluidics device contains two aqueous inlets (#1 and #2) for injecting core forming solution and shell forming solution, one inlet for the carrier oil (#3) and one outlet for collecting the droplets (#4). The water-in-oil droplets are generated at a flow-focusing junction, collected at the collection outlet in the form of emulsion and are converted to microcapsules using a two-step polymerization process as detailed in Materials and Methods section. **B)** Design of the microfluidics device. Scale bar 1 mm. **C)** Digital micrographs showing droplet generation and collection. Scale bars, 100  $\mu\text{m}$ .

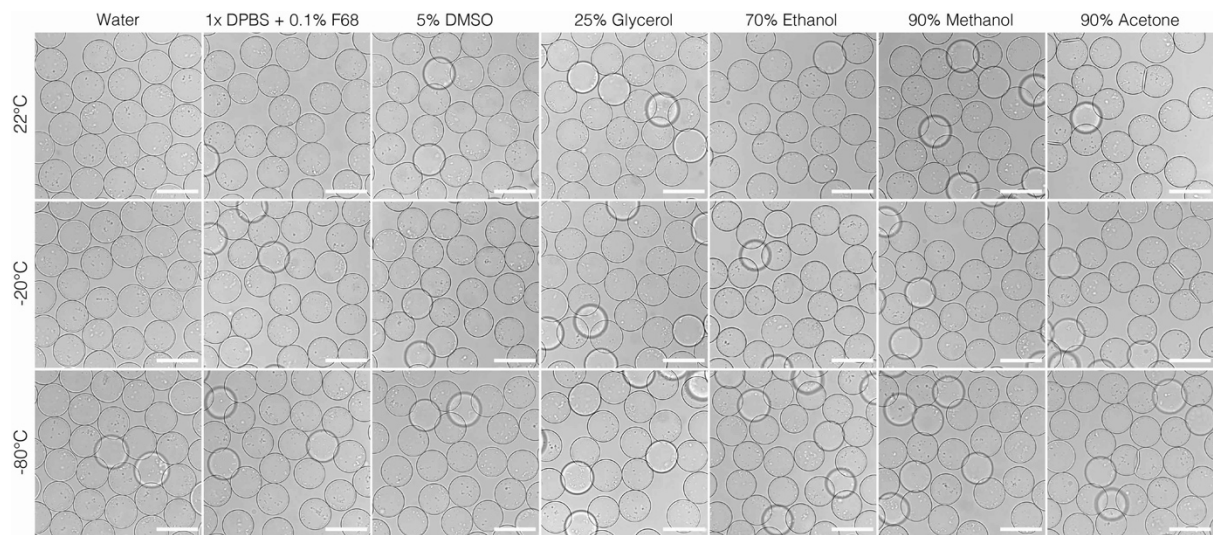

**Supplementary Figure S2. Evaluation of microcapsule stability.** Bright field microscopy images of the microcapsules in different solvents at room temperature (top row), after freezing at -20 °C for 16 hours (middle row), and after freezing at -80 °C for 16 hours (bottom row). Scales bars, 100  $\mu\text{m}$ .

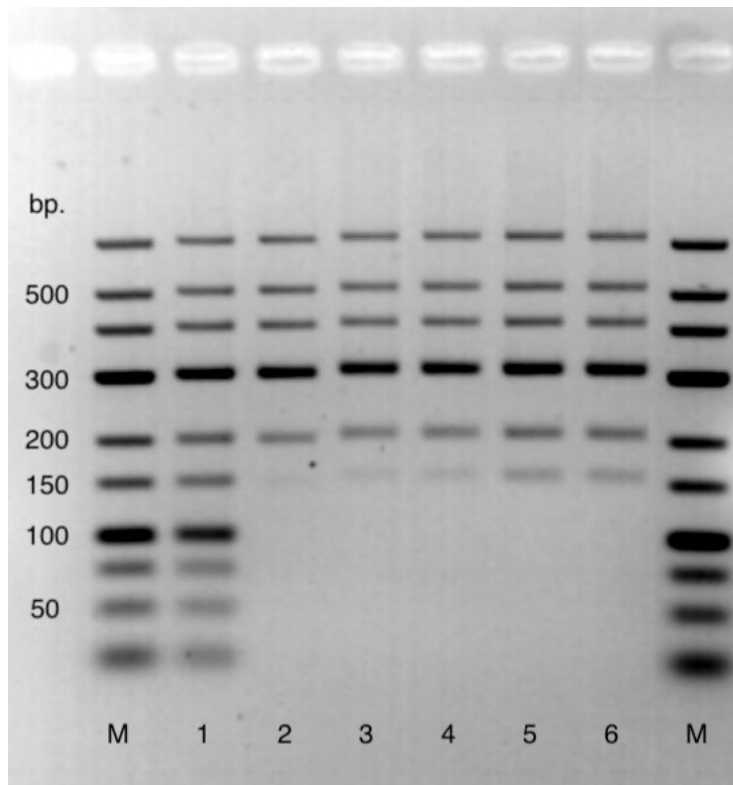

**Supplementary Figure S3. Double stranded DNA retention in microcapsules at different temperatures.** Agarose gel showing DNA retention in microcapsules after incubation for 30 minutes at different temperatures ranging from 4 to 70 °C. The GeneRuler Low Range DNA Ladder (Thermo Fischer Scientific, SM1191) was used to evaluate the size of retained DNA molecules in microcapsules. After a 30-minute incubation at a given temperature, the microcapsules were broken and the collected DNA was loaded on agarose gel for DNA electrophoresis.

M – GeneRuler Low Range DNA Ladder.

1 – DNA retention in water-in-oil emulsion.

2 – DNA retention in microcapsules after physical gelation and incubation at 4 °C for 30 min.

3 – DNA retention in microcapsules after chemical cross-linking and incubation at 4 °C for 30 min.

4 – DNA retention in microcapsules after chemical cross-linking and incubation at 22 °C for 30 min.

5 – DNA retention in microcapsules after chemical cross-linking and incubation at 50 °C for 30 min.

6 – DNA retention in microcapsules after chemical cross-linking and incubation at 70 °C for 30 min.

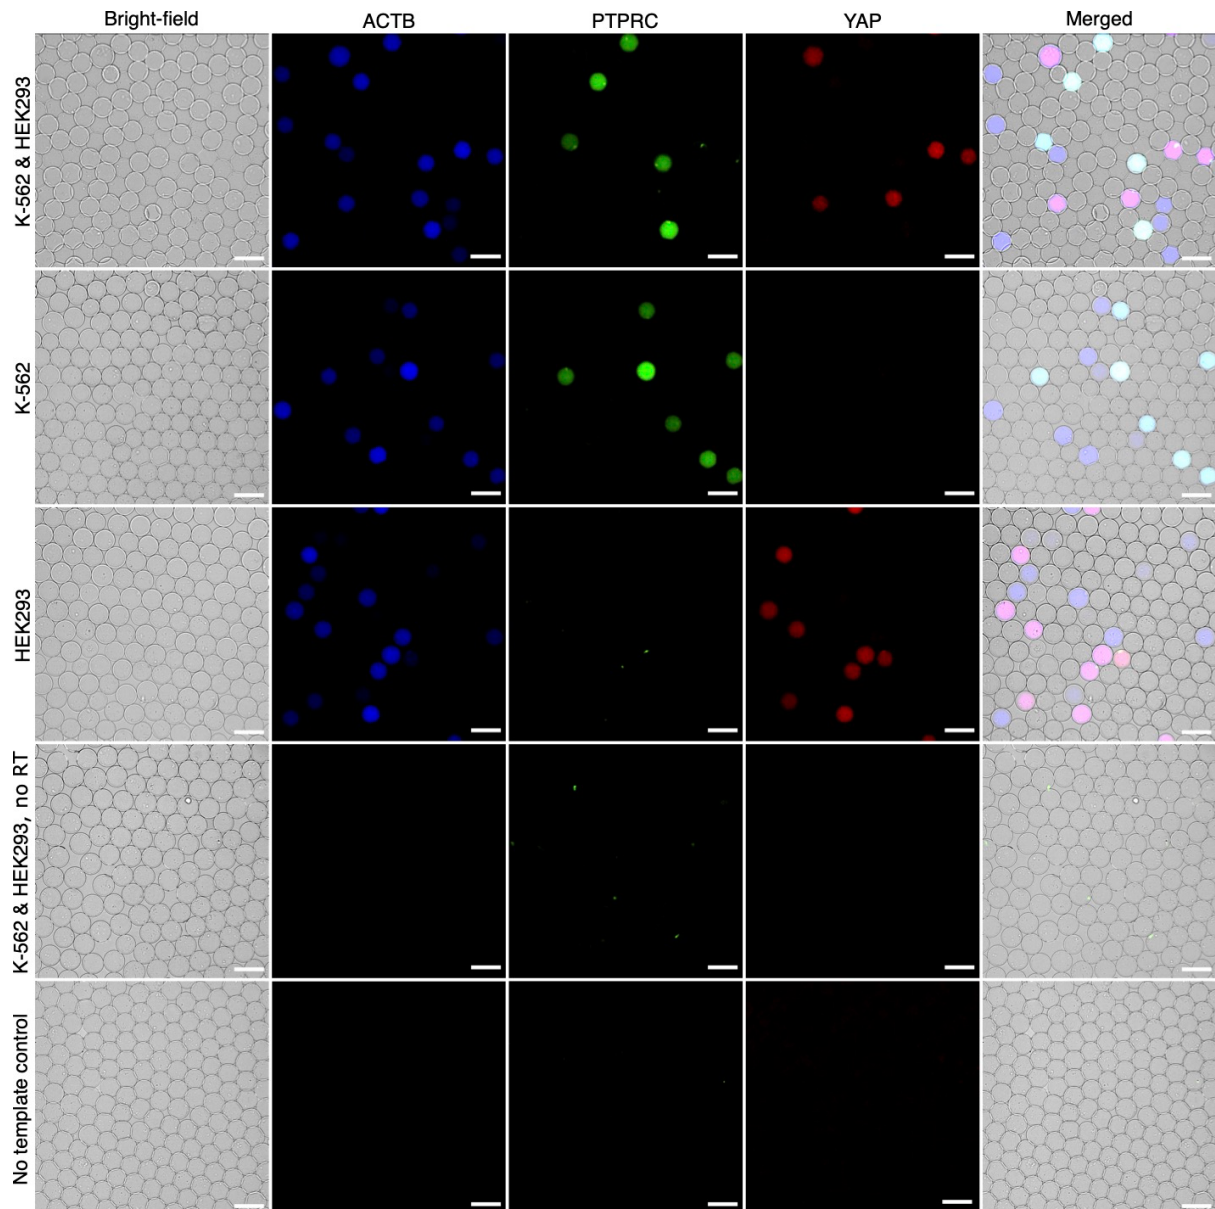

**Supplementary Figure S4. Microcapsule-based single-cell RT-PCR.** Digital microscopy images of microcapsules following a multiplex RT-PCR assay prepared with different biological samples. After cell encapsulation and prior to the reverse transcription step, the microcapsules were treated with DNase I enzyme to deplete the gDNA. From top to bottom microcapsules comprised: a mixture of K-562 and HEK293 cells (1<sup>st</sup> row), K-562 cells alone (2<sup>nd</sup> row), HEK293 cells alone (3<sup>rd</sup> row), no RT enzyme control (4<sup>th</sup> row), and no template control (5<sup>th</sup> row). The digital images from left to right indicate: bright field, Alexa Fluor 647 fluorescence for ACTB marker (blue), Alexa Fluor 488 fluorescence for PTPRC marker (green), Alexa Fluor 555 fluorescence for YAP marker (red) and merged image where bright field and fluorescence photographs are superimposed. Scale bars, 100  $\mu\text{m}$ .

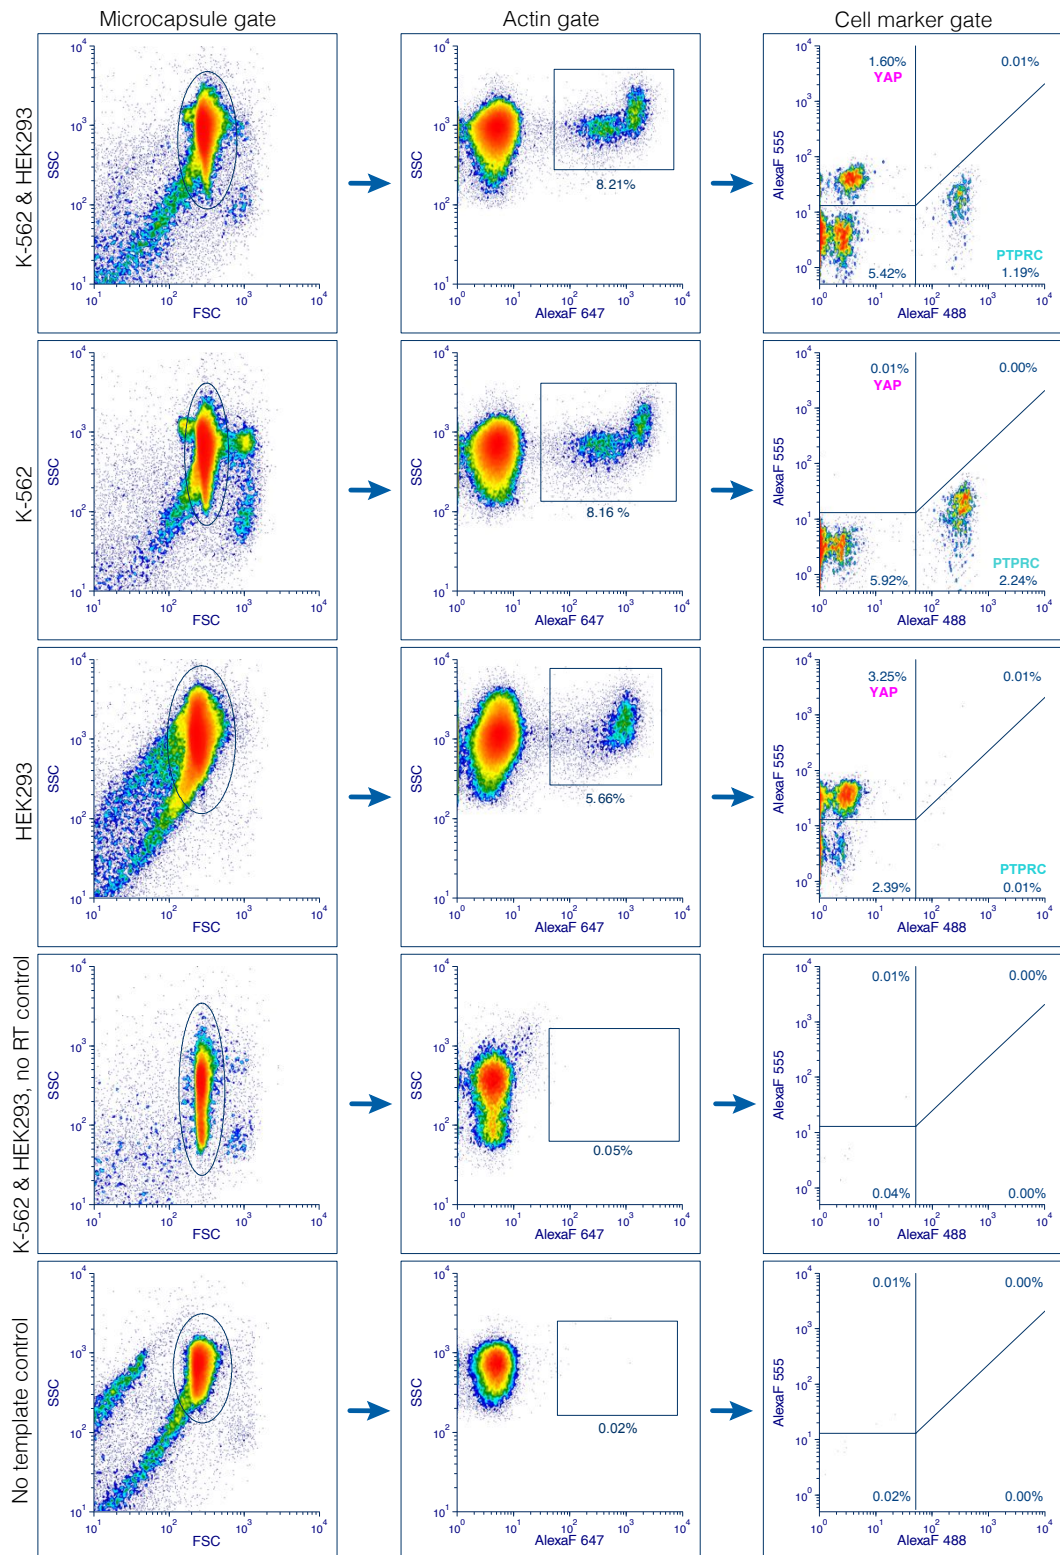

**Supplementary Figure S5. Flow cytometry of microcapsules following single-cell RT-PCR.** The flow cytometry analysis of microcapsules prepared with a mixture of K-562 and HEK293 cells (top row), K-562 cells (2<sup>nd</sup> row), HEK293 cells (3<sup>rd</sup> row), no RT enzyme control (4<sup>th</sup> row) and no template control (5<sup>th</sup> row). The microcapsules were first gated based on forward and side scatter (Microcapsule gate), expression of ACTB marker (Actin gate) and then the expression of PTPRC and YAP markers was recorded (Cell marker gate). Due to the emission overlap of Alexa Fluor 488 and Alexa Fluor 555 dyes and imperfect compensation process, the PTPRC-positive population showed an increased fluorescence in Alexa Fluor 555 channel. The percentages indicate the total events ( $n \sim 100,000$ ).



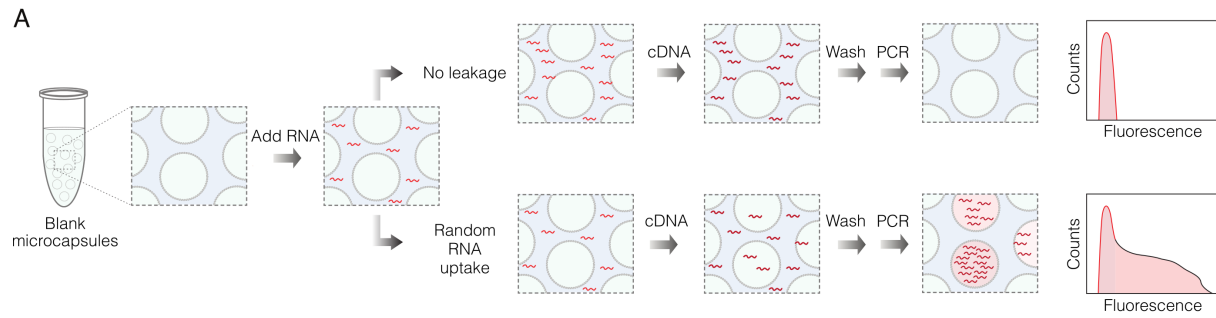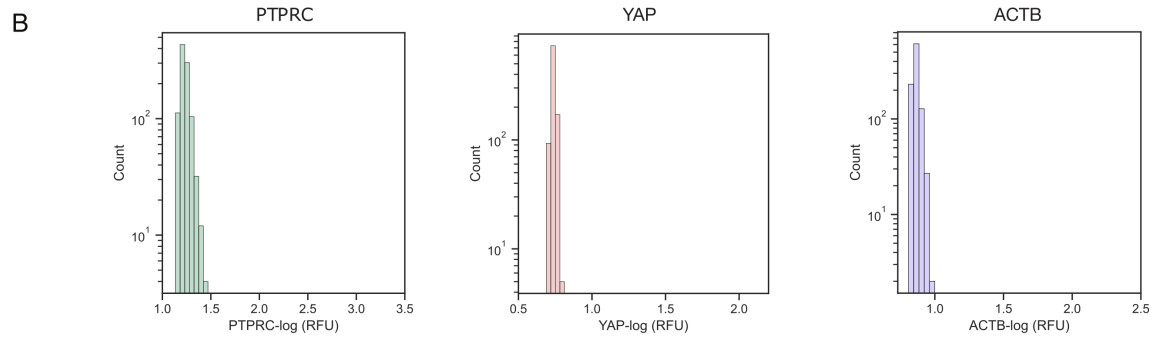

**Supplementary Figure S6. RNA and cDNA leakage test. A)** Experimental scheme. Purified total RNA (2  $\mu\text{g}$ ) from a mixture of HEK293:K-562 cells is added to the RT reaction mixture ( $V = 200 \mu\text{l}$ ) supplemented with  $\sim 200,000$  blank (empty) microcapsules. After cDNA synthesis, the microcapsules were washed to remove unretained RNA and cDNA molecules, and transferred to PCR reaction mixture to amplify YAP, PTPRC and ACTB targets. In the presence of RNA or cDNA uptake the microcapsules will show increased fluorescence, in the absence of leakage the microcapsules will remain blank (non-fluorescent). **B)** The fluorescence histograms for PTPRC, YAP and ACTB markers were constructed by measuring the fluorescence of post-RT-PCR microcapsules ( $n \sim 1000$ ) following the experiments scheme indicated in panel A.



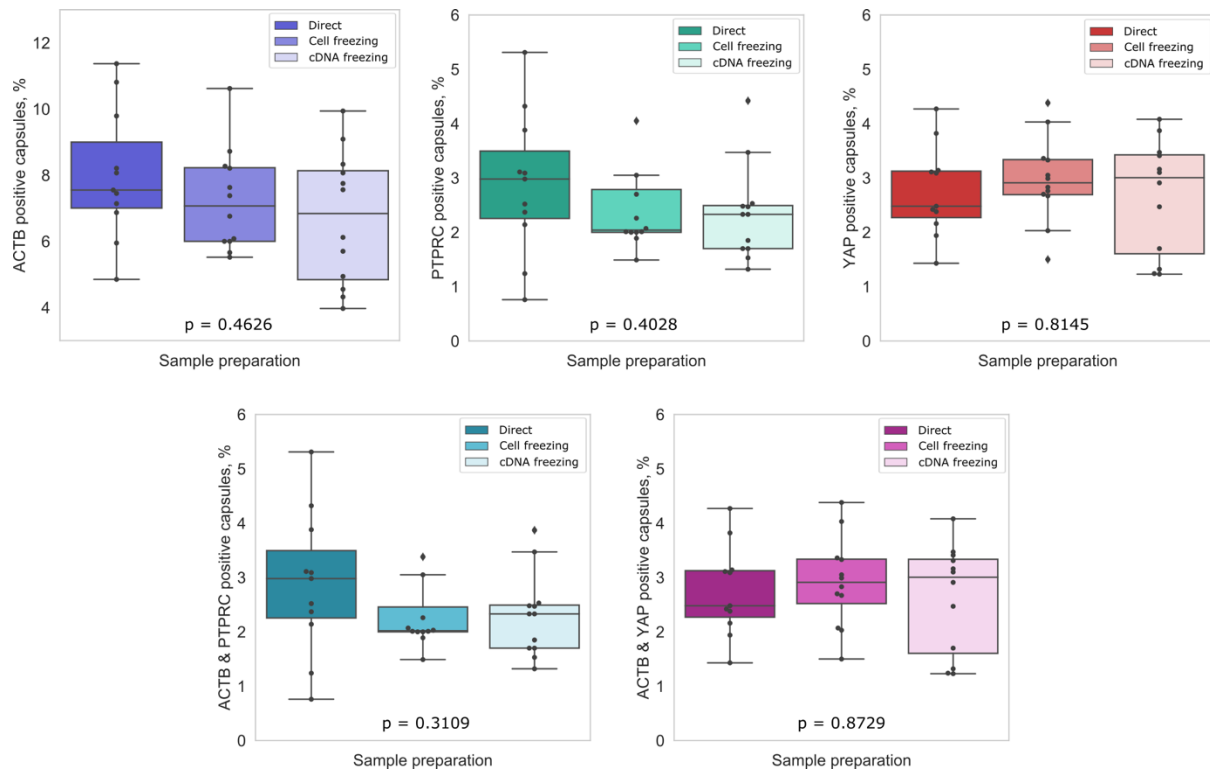

**Supplementary Figure S7. Performance of multiplex scRT-PCR on live-cells, ethanol-preserved cells and ethanol-preserved cDNA samples.** The boxplots representing the distribution of positive microcapsules for ACTB, PTPRC, YAP, ACTB & PTPRC and ACTB & YAP markers obtained following three different sample preparation workflows. To begin with the microcapsules carrying a mixture of K-562 and HEK293 cells were divided into three parts. The first part (Direct workflow) was processed under the harsh-lysis conditions followed by gDNA depletion as detailed in Materials and Methods section. The second part (Cell freezing workflow) was dispersed in 70% (v/v) ethanol to fix the encapsulated cells, transferred to -20 °C for 20-24 hours, thawed and then subjected to harsh-lysis and gDNA depletion. The third part (cDNA freezing workflow) was treated under the harsh-lysis and gDNA depletion conditions, subjected to cDNA synthesis and then frozen at -20 °C in 70% (v/v) ethanol. All three workflows were subjected to the same RT and PCR conditions. The p values were calculated applying nonparametric Kruskal-Wallis test. All p values were higher than 0.05, which indicates statistically insignificant differences between sample processing techniques.

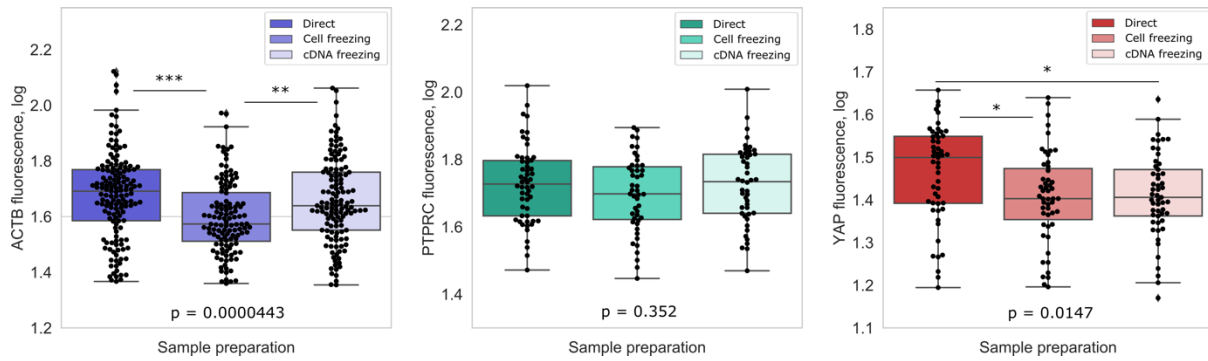

**Supplementary Figure S8. Fluorescence intensity of multiplex scRT-PCR assay on live-cells, alcohol-preserved cells and alcohol-preserved nucleic acid material.** The measured fluorescence intensities of ACTB (left), PTPRC (middle) and YAP (right) amplicons are plotted. Three different workflows were tested: direct workflow on live-cells (Direct), ethanol-fixation of cells and freezing at  $-20^{\circ}\text{C}$  (Cell freezing) and cDNA preservation workflow on the cDNA material that was generated from live-cells in microcapsules, and then frozen at  $-20^{\circ}\text{C}$  in 70% ethanol (cDNA freezing). One-way ANOVA showed there is no statistically significant difference in mean PTPRC fluorescence between different sample preparations ( $p = 0.352$ ). However, statistically significant differences in mean fluorescence signal intensity were observed for ACTB ( $p = 0.0000443$ ) and YAP ( $p = 0.0147$ ). Pairwise comparison using Tukey post hoc test revealed that statistically significant differences in mean ACTB fluorescence intensity exist between direct workflow and cell freezing ( $p < 0.001$ ) and cell freezing and cDNA freezing ( $p = 0.0033$ ). Likewise, statistically significant differences in mean YAP fluorescence intensity were obtained between direct workflow and cell freezing ( $p = 0.0254$ ) and direct workflow and cDNA freezing ( $p = 0.0382$ ). In addition, the distribution normality was verified applying Lilliefors (Kolmogorov-Smirnov) normality test. Corresponding p values for ACTB, PTPRC and YAP fluorescence were 0.1118, 0.6766, 0.3761, which confirm a normal data distribution. The Levene's test for homogeneity of variance gave p values for ACTB, PTPRC and YAP fluorescence 0.2213, 0.9549 and 0.2439, respectively.

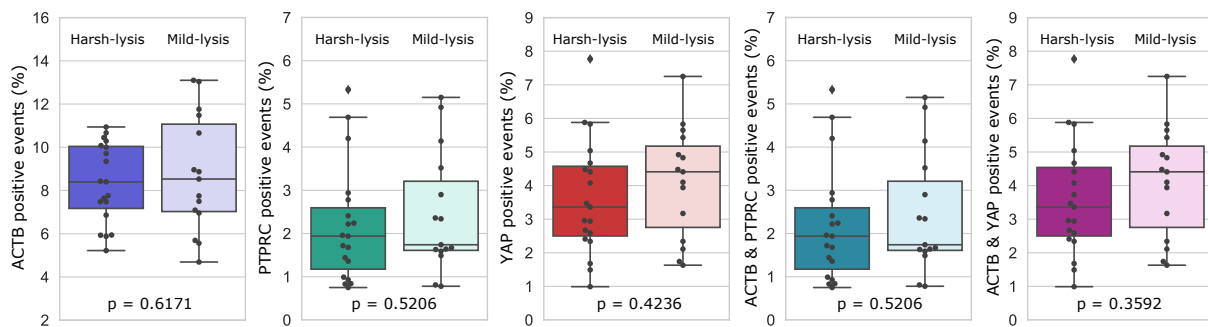

**Supplementary Figure S9. Comparison of multiplex scRT-PCR output using mild- and harsh-lysis protocols.** The boxplots represent the distribution of ACTB, PTPRC, YAP, ACTB & PTPRC and ACTB & YAP positive events in microcapsule-based RT-PCR assay following two cell lysis conditions. Under the harsh-lysis conditions the encapsulated cells were treated using GeneJET lysis buffer and DNase I as detailed in Materials and Methods section. Under the mild-lysis conditions the encapsulated cells were first fixed in ethanol and then lysed with non-ionic detergent Igepal CA-630 as detailed in Materials and Methods section. The p values were calculated by applying nonparametric Wilcoxon rank sum test. The p values were higher than 0.05, which indicates statistically insignificant differences between the mild- and harsh-lysis protocols.

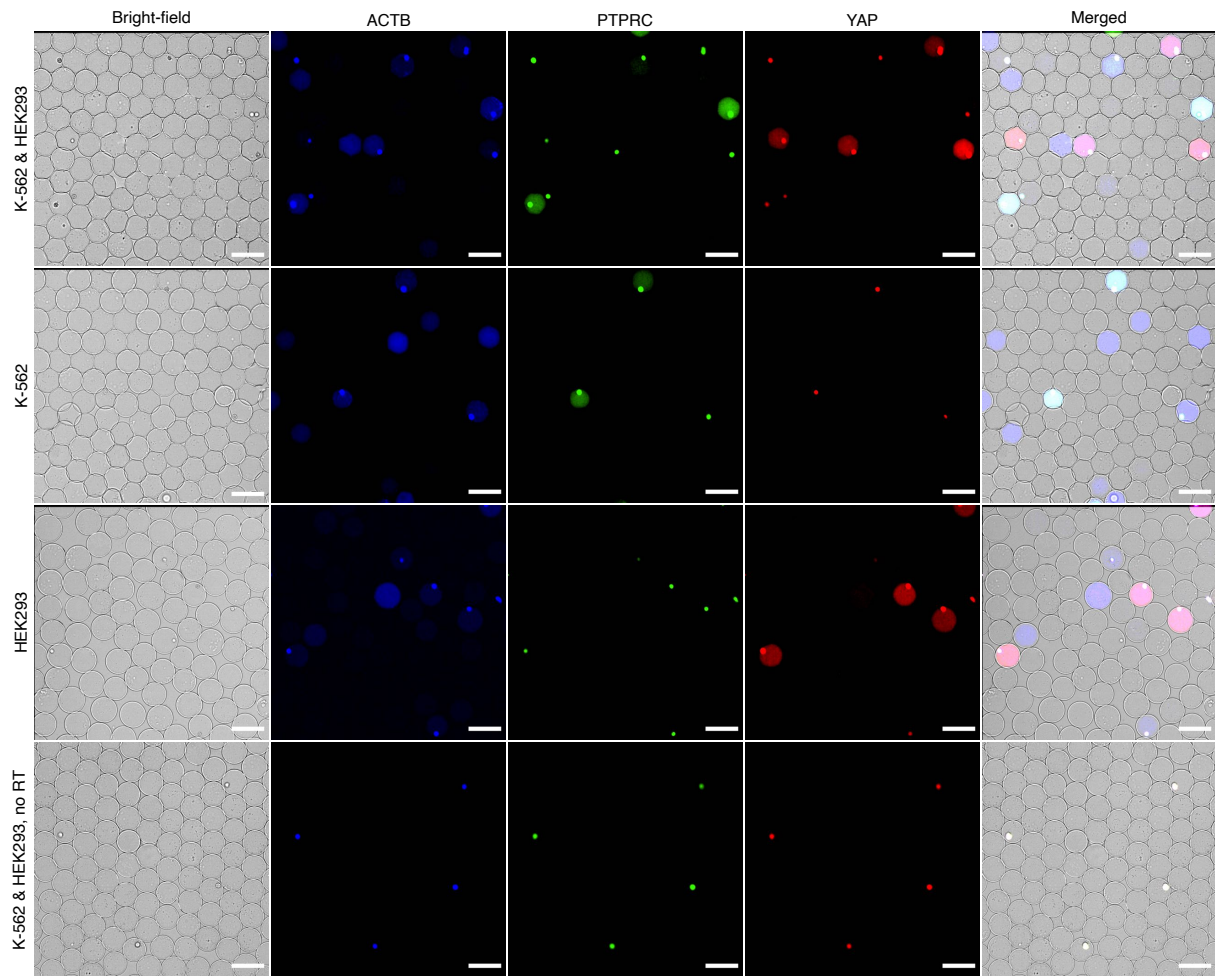

**Supplementary Figure S10. Microcapsule-based single-cell RT-PCR following cell preservation.**

Digital microscopy images of microcapsules following a multiplex RT-PCR assay under conditions that preserve cell nucleus. The encapsulated cells were preserved in ice-cold ethanol and subjected to multiplex RT-PCR targeting ACTB (blue), PTPRC (green) and YAP (red). From top to bottom microcapsules comprised: a mixture of K-562 and HEK293 cells (1<sup>st</sup> row), K-562 cells alone (2<sup>nd</sup> row), HEK293 cells alone (3<sup>rd</sup> row), no RT enzyme control (4<sup>th</sup> row). The digital images from left to right indicate: bright field, Alexa Fluor 647 fluorescence for ACTB marker (blue), Alexa Fluor 488 fluorescence for PTPRC marker (green), Alexa Fluor 555 fluorescence for YAP marker (red) and merged image where bright field and fluorescence photographs are superimposed. Scale bars, 100  $\mu\text{m}$ .

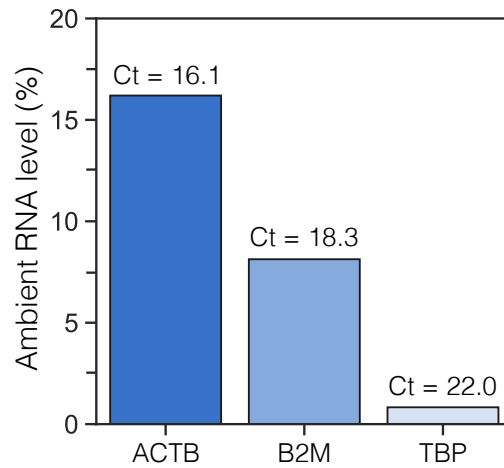

**Supplementary Figure S11. The ambient RNA levels for different housekeeping genes in a mixture containing K-562 and HEK293 cells.** The ambient RNA levels were determined by performing multiplex RT-PCR on a mixture of K-562 / HEK293 cells and recording the fraction of the cell-free microcapsules positive for a given housekeeping gene. The percentage on Y-axis is expressed as  $y = \left(\frac{n_1}{n_1 + n_2}\right) \times 100\%$ , where  $n_1$  is cell-free microcapsules positive for a given housekeeping gene and  $n_2$  is microcapsules carrying cells and are positive for a housekeeping gene. The average Ct values obtained from three independent bulk RT-qPCR experiments.

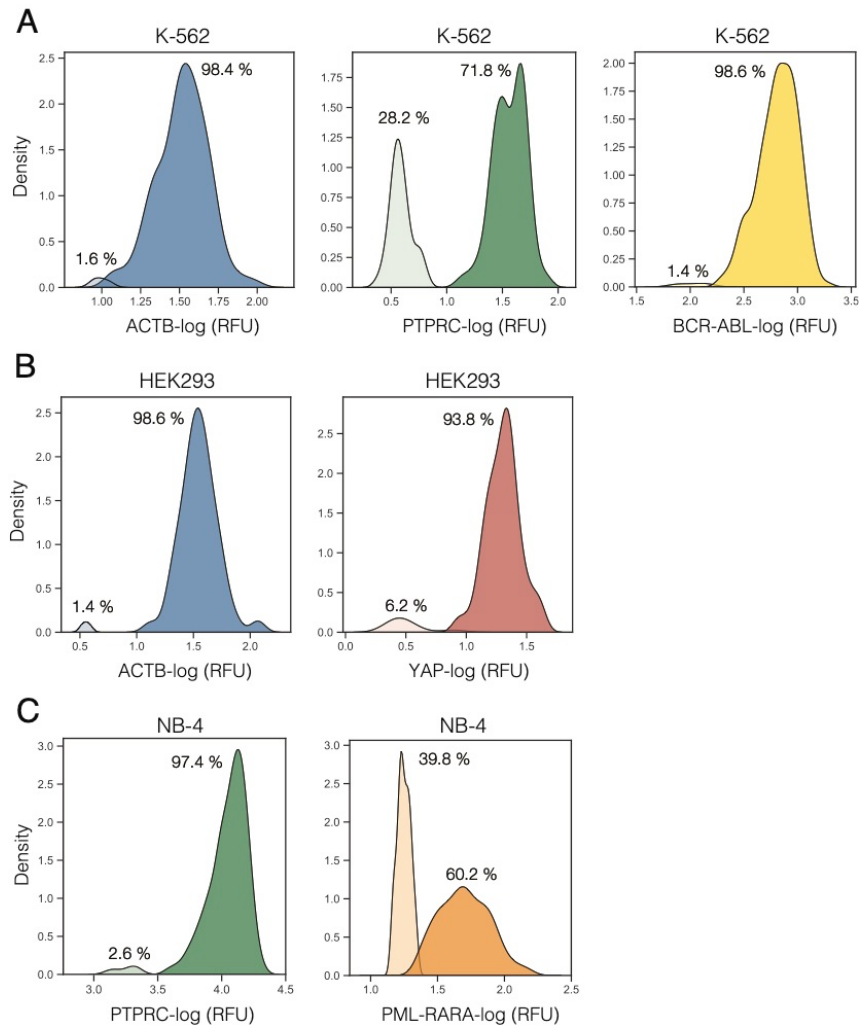

**Supplementary Figure S12. Digital profiling of K-562, HEK293 and NB-4 cells for marker gene expression.** The histograms represent the fluorescence distribution of microcapsule-based scRT-PCR readout for ACTB (blue), YAP (red), PTPRC (green), BCR-ABL (yellow) and PML-RAR $\alpha$  (orange) transcripts in individual cell lines. **A**) Digital profiling of K-562 cells for ACTB, PTPRC and BCR-ABL fusion expression. **B**) Digital profiling of HEK293 cells for ACTB and YAP expression. **C**) Digital profiling of NB-4 cells for PTPRC and PML-RAR $\alpha$  fusion expression.

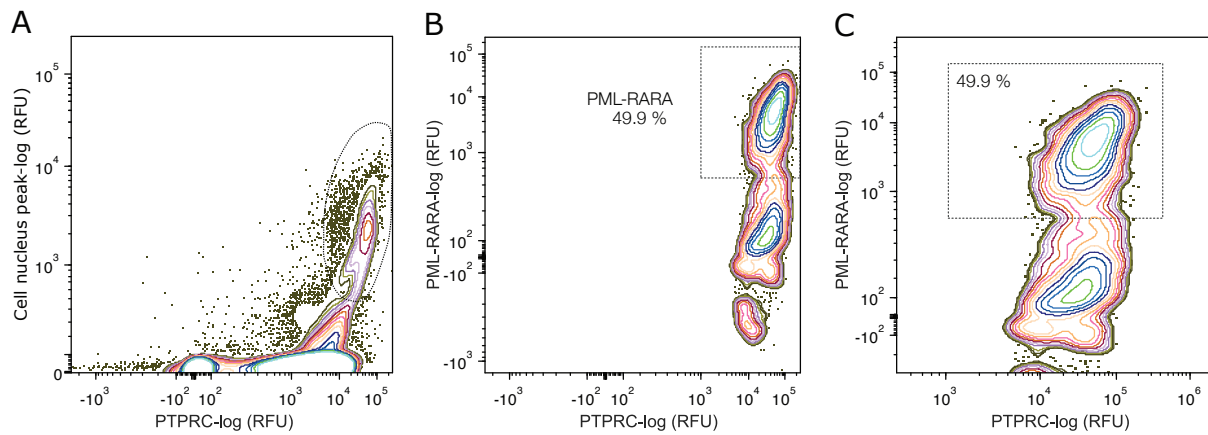

**Supplementary Figure S13. Gating strategy for analyzing PML-RAR $\alpha$  expression using FACS instrument.** **A)** At first microcapsules are gated based on the fluorescence signal of cell nuclei (Y-axis) and ubiquitously expressed marker PTPRC (X-axis). **B)** The microcapsules with cells from panel A are then evaluated for co-expression of PML-RAR $\alpha$  and PTPRC, replotted in panel C, which is then reported in the main text (Figure 6).

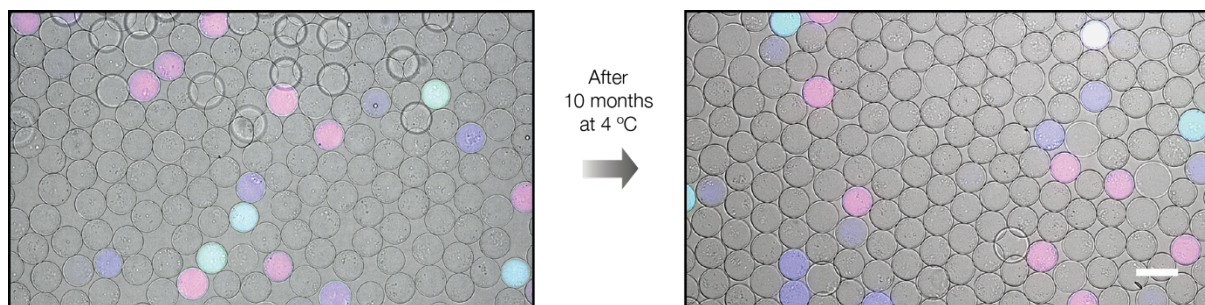

**Supplementary Figure S14. Single-cell RT-PCR amplicon retention in microcapsules over a period of 10 months.** The mixture of K-562 of HEK293 cells was encapsulated in microcapsules, lysed and their gDNA digested with DNase I. Next, the microcapsules were subjected to reverse transcription using poly(dT) primers followed by multiplex PCR using fluorescently labelled primers (Supplementary Table S1) targeting cDNA molecules encoding PTPRC, YAP and ACTB markers. The PCR amplicons for PTPRC, YAP and ACTB markers, were 532, 584 and 607 bp. size, respectively. The post-RT-PCR microcapsules were imaged under epifluorescence microscope at day 1 (left) and 297 days later (right). During this period of time the microcapsules were stored at 4 °C in 10 mM Tris-HCl [pH 7.5], 0.1% Triton-X-100, 1 mM EDTA buffer. No significant fluorescence difference or change in occupancy was recorded between day-1 and day-297. At day-1, the percentage of ACTB, PTPRC and YAP positive microcapsules was 8.2% 1.9% and 3.7%, respectively. At day-297, the percentage of ACTB, PTPRC and YAP positive microcapsules remained nearly the same: 8.1%, 1.85% and 3.7%, respectively. Scale bar 100  $\mu$ m.
